# Supplementary material
Source: PubMed Central journal article supplement (PMC2614403)

## **Supporting Information**

### **Cytotoxic Prenylated Stilbenes and Flavonoids from *Macaranga alnifolia* from the Madagascar Rain Forest**

Brent Yoder, Shugeng Cao, Andrew Norris, James S. Miller, Fidy Ratovoson, Jeremi Razafitsalama,

Rabodo Andriantsiferana, Vincent E. Rasamison, and David G. I. Kingston

#### **Contents:**

**Characterization Data for Compounds 6-10**

**NCI 60-Cell Line Data for Compound 1**

**$^1\text{H}$  and  $^{13}\text{C}$  NMR Spectra of Compounds 1-10**

## Characterization Data for Compounds 6-10

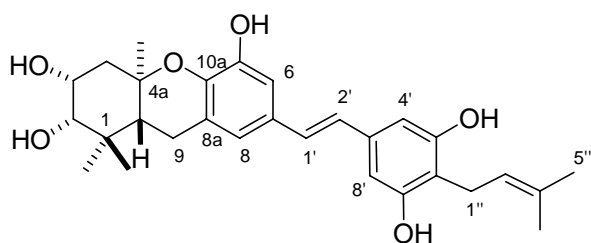

6

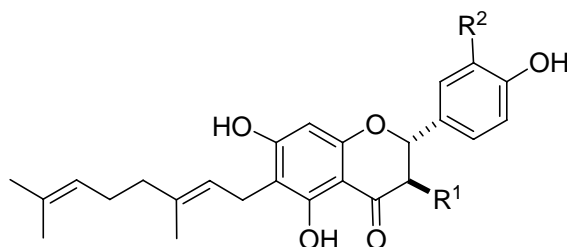

7 R<sup>1</sup> = OH, R<sup>2</sup> = H

8 R<sup>1</sup> = R<sup>2</sup> = OH

9 R<sup>1</sup> = R<sup>2</sup> = H

10 R<sup>1</sup> = H, R<sup>2</sup> = OH

**Vedelianin (6):** yellowish solid;  $[\alpha]_D^{22} +32.9$  ( $c$  0.07, CH<sub>3</sub>OH); UV (MeOH)  $\lambda_{\max}$  331, 224 nm; <sup>1</sup>H NMR (CD<sub>3</sub>OD, 500 MHz)  $\delta$  6.80 (1H, d,  $J$  = 16.5 Hz, H-1'), 6.79 (1H, d, H-6), 6.72 (1H, d, H-8), 6.70 (1H, d,  $J$  = 16 Hz, H-2'), 6.44 (2H, s, H-4', 8'), 5.23 (1H, tq,  $J$  = 7, 1.5 Hz, H-2''), 4.15 (1H, q,  $J$  = 3.5 Hz, H-3), 3.30 (partially obscured by solvent, H-2, 1''), 2.75 (2H, m, H-9), 2.37 (1H, dd,  $J$  = 14, 3.5 Hz, H-4), 1.96 (1H, dd,  $J$  = 14.5, 3.5 Hz, H-4), 1.76 (3H, s, H-4''), 1.75 (1H, m, H-9a), 1.65 (3H, s, H-5''), 1.42 (3H, s, H-13), 1.11 (3H, s, H-12), 1.09 (3H, s, H-11); <sup>13</sup>C NMR (CD<sub>3</sub>OD, 125 MHz)  $\delta$  157.3 (C-5', 7'), 147.2 (C-5), 137.6 (C-10a), 131.1 (C-3''), 130.9 (C-7), 128.6 (C-1'), 127.4 (C-2'), 124.6 (C-2''), 124.2 (C-8a), 120.4 (C-8), 115.9 (C-6'), 111.1 (C-6), 105.7 (C-4', 8'), 78.9 (C-2), 78.1 (C-4a), 71.8 (C-3), 44.8 (C-4), 39.2 (C-1), 29.4 (C-12), 26.0 (C-5''), 23.9 (C-9), 23.3 (C-1''), 22.0 (C-13), 17.9 (C-4''), 16.6 (C-11); HRFABMS  $m/z$  480.2519 [M]<sup>+</sup> (calcd for C<sub>25</sub>H<sub>36</sub>O<sub>6</sub>, 480.2512).

**Bonanniol A (7):** yellowish-brown solid;  $[\alpha]_D^{23} +21.7$  ( $c$  0.27, CH<sub>3</sub>OH); UV (MeOH)  $\lambda_{\max}$  296, 206 nm; <sup>1</sup>H NMR (CD<sub>3</sub>OD, 500 MHz)  $\delta$  7.33 (2H, d,  $J$  = 8.5 Hz, H-2', 6'), 6.82 (2H, d,  $J$  = 8.5 Hz, H-3', 5'), 5.92 (1H, s, H-8), 5.19 (2H, t, H-2''), 5.05 (2H, t, H-7''), 4.92 (1H, d,  $J$  = 11.5 Hz, H-2), 4.51 (1H, d,  $J$  = 11.5 Hz, H-3), 3.21 (2H, d, H-1''), 2.03 (2H, q, H-6''), 1.94 (2H, t,  $J$  = 8 Hz, H-5''), 1.74 (3H, s, H-4''), 1.61 (3H, s, H-9''), 1.55 (3H, s, H-10''); <sup>13</sup>C NMR (CD<sub>3</sub>OD, 125 MHz)  $\delta$  197.2 (C-4), 165.0 (C-7), 160.9 (C-5), 160.9 (C-9), 157.8 (C-4'), 134.0 (C-3''), 130.7 (C-8''), 129.0 (C-2', 6'), 128.1 (C-1'), 124.2 (C-7''),

122.5 (C-2''), 114.8 (C-3'), 114.8 (C-5'), 108.8 (C-6), 100.3 (C-10), 94.3 (C-8), 83.6 (C-2), 72.4 (C-3), 39.6 (C-5''), 26.4 (C-6''), 24.5 (C-9''), 20.5 (C-1''), 16.4 (C-10''), 14.9 (C-4''); HRFABMS  $m/z$  425.1929  $[M+H]^+$  (calcd for  $C_{25}H_{29}O_6$ , 425.1964).

**Diplacol (8):** yellowish-brown solid;  $[\alpha]_D^{23} +18.6$  ( $c$  0.44,  $CH_3OH$ ); UV (MeOH)  $\lambda_{max}$  295, 215 nm;  $^1H$  NMR ( $CD_3OD$ , 500 MHz)  $\delta$  6.95 (1H, s, H-2'), 6.83 (1H, dd, H-5'), 6.79 (1H, d, H-6'), 5.91 (1H, s, H-8), 5.19 (2H, t, H-2''), 5.06 (2H, t, H-7''), 4.47 (1H, d,  $J = 11.5$  Hz, H-3), 3.22 (2H, d,  $J = 7$  Hz, H-1''), 2.04 (2H, q, H-6''), 1.95 (2H, t,  $J = 8$  Hz, H-5''), 1.75 (3H, s, H-4''), 1.61 (3H, s, H-9''), 1.56 (3H, s, H-10'');  $^{13}C$  NMR ( $CD_3OD$ , 125 MHz)  $\delta$  197.1 (C-4), 165.0 (C-7), 160.9 (C-5), 160.9 (C-9), 145.8 (C-4'), 145.0 (C-3'), 134.1 (C-3''), 130.7 (C-8''), 128.7 (C-1'), 124.2 (C-7''), 122.5 (C-2''), 119.6 (C-6'), 114.8 (C-5'), 114.6 (C-2''), 108.7 (C-6), 100.4 (C-10), 94.2 (C-8), 83.8 (C-2), 72.5 (C-3), 39.6 (C-5''), 26.4 (C-6''), 24.5 (C-9''), 20.5 (C-1''), 16.4 (C-10''), 14.9 (C-4''); HRFABMS  $m/z$  425.1948  $[M+H]^+$  (calcd for  $C_{25}H_{29}O_6$ , 425.1964).

**Bonannione A (9):** yellowish-brown solid;  $[\alpha]_D^{23} 0$  ( $c$  0.08,  $CH_3OH$ ); UV (MeOH)  $\lambda_{max}$  294, 207 nm;  $^1H$  NMR ( $CD_3OD$ , 500 MHz)  $\delta$  7.30 (2H, d,  $J = 8.5$  Hz, H-2', 6'), 6.81 (2H, d,  $J = 8.5$  Hz, H-3', 5'), 5.92 (1H, s, H-8), 5.30 (1H, dd, H-2), 5.18 (2H, t, H-2''), 5.06 (2H, t, H-7''), 3.20 (2H, d,  $J = 7$  Hz, H-1''), 3.09 (1H, dd,  $J = 13$  Hz, H-3a), 2.66 (1H, dd,  $J = 17, 3$  Hz, H-3b), 2.04 (2H, q, H-6''), 1.94 (2H, t,  $J = 8$  Hz, H-5''), 1.74 (3H, s, H-4''), 1.61 (3H, s, H-9''), 1.56 (3H, s, H-10'');  $^{13}C$  NMR ( $CD_3OD$ , 125 MHz)  $\delta$  196.4 (C-4), 165.0 (C-7), 161.2 (C-5), 161.1 (C-9), 157.7 (C-4'), 133.9 (C-3''), 130.7 (C-8''), 130.0 (C-1'), 127.7 (C-2', 6'), 124.2 (C-7''), 122.7 (C-2''), 115.0 (C-3', 5'), 108.4 (C-6), 101.8 (C-10), 94.2 (C-8), 79.1 (C-2), 42.9 (C-3), 39.6 (C-5''), 26.4 (C-6''), 24.5 (C-9''), 20.5 (C-1''), 16.4 (C-10''), 14.9 (C-4''); HRFABMS  $m/z$  409.1813  $[M+H]^+$  (calcd for  $C_{25}H_{29}O_5$ , 409.2015).

**Diplacone (10):** yellowish-brown solid;  $[\alpha]_D^{23} -13.2$  ( $c$  0.33,  $CH_3OH$ ); UV (MeOH)  $\lambda_{max}$  292, 207 nm;  $^1H$  NMR ( $CD_3OD$ , 500 MHz)  $\delta$  6.90 (1H, s, H-2'), 6.77 (2H, s, H-5', 6'), 5.93 (1H, s, H-8), 5.23

(1H, dd, H-2), 5.18 (2H, t, H-2''), 5.05 (2H, t, H-7''), 3.20 (2H, d,  $J = 7.5$  Hz, H-1''), 3.03 (1H, dd,  $J = 17$ , 13 Hz, H-3a), 2.66 (1H, dd,  $J = 17$ , 3 Hz, H-3b), 2.04 (2H, q,  $J = 7.5$  Hz, H-6''), 1.94 (2H, t,  $J = 8$  Hz, H-5''), 1.74 (3H, s, H-4''), 1.61 (3H, s, H-9''), 1.55 (3H, s, H-10'');  $^{13}\text{C}$  NMR ( $\text{CD}_3\text{OD}$ , 125 MHz)  $\delta$  196.5 (C-4), 164.7 (C-7), 161.2 (C-5), 161.2 (C-9), 145.5 (C-4'), 145.2 (C-3'), 133.9 (C-3''), 130.6 (C-8''), 127.7 (C-1'), 124.2 (C-7''), 122.6 (C-2''), 117.9 (C-6'), 114.9 (C-5'), 113.4 (C-2'), 108.4 (C-6), 101.9 (C-10), 94.1 (C-8), 79.1 (C-2), 42.9 (C-3), 39.6 (C-5''), 26.4 (C-6''), 24.5 (C-9''), 20.5 (C-1''), 16.4 (C-10''), 14.9 (C-4''); HRFABMS  $m/z$  441.1911  $[\text{M}+\text{H}]^+$  (calcd for  $\text{C}_{25}\text{H}_{29}\text{O}_7$ , 449.1913).

# NCI 60-Cell Line Data for Compound 1

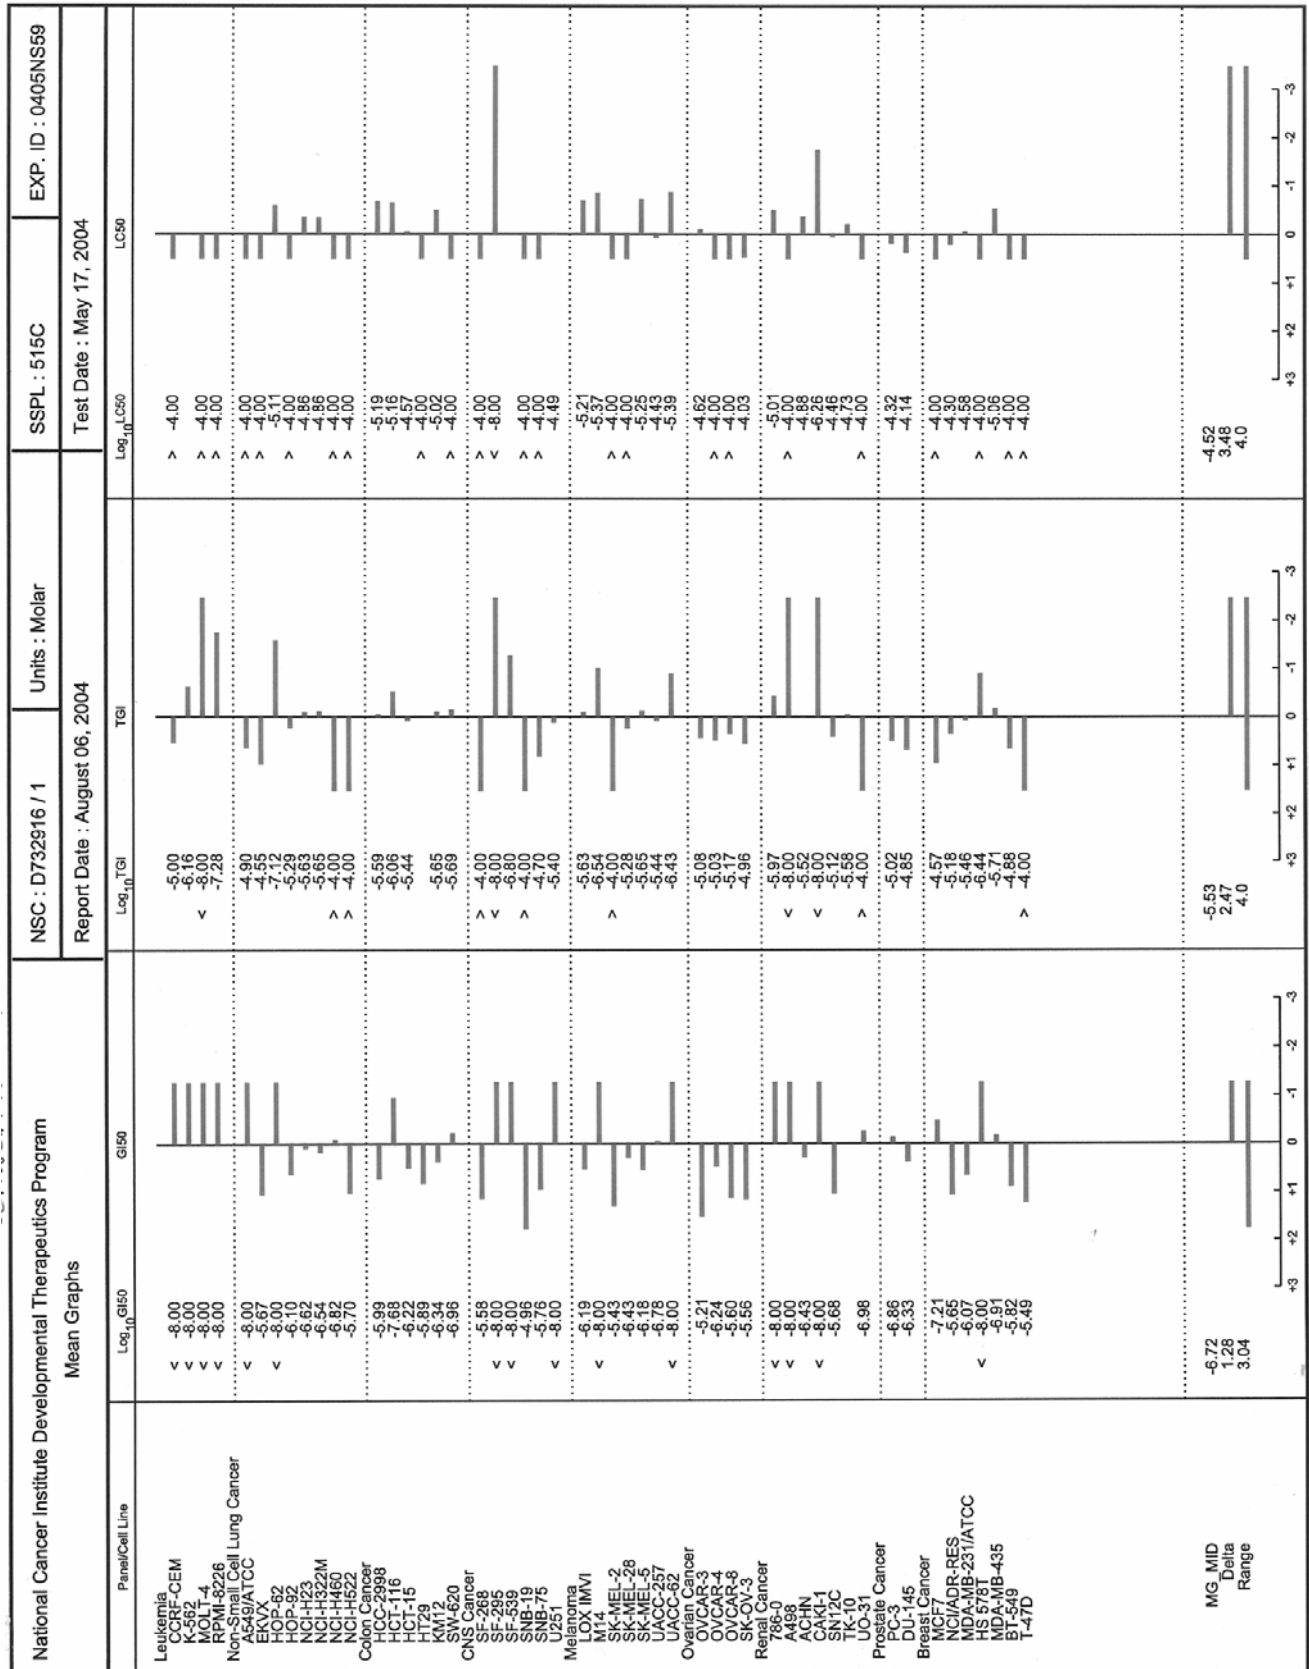

National Cancer Institute Developmental Therapeutics Program  
Dose Response Curves

NSC : D732916 / 1  
Report Date : August 06, 2004

SSPL : 515C  
Test Date : May 17, 2004

EXP. ID : 0405NS59

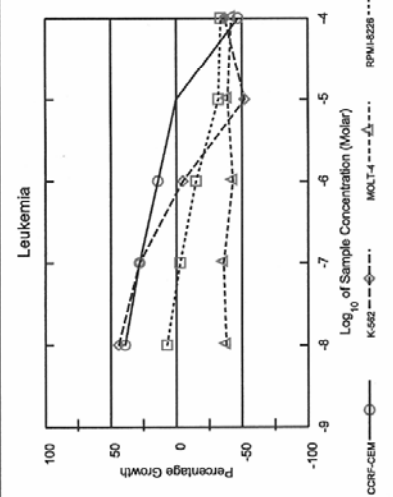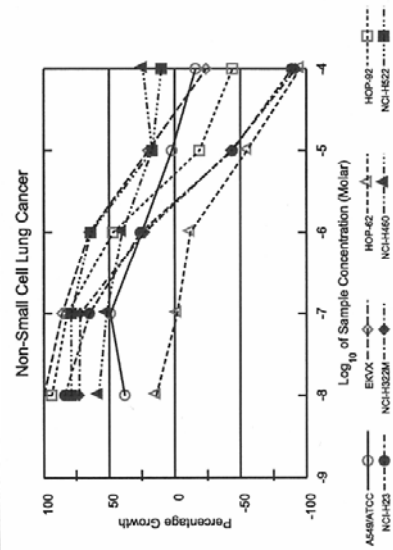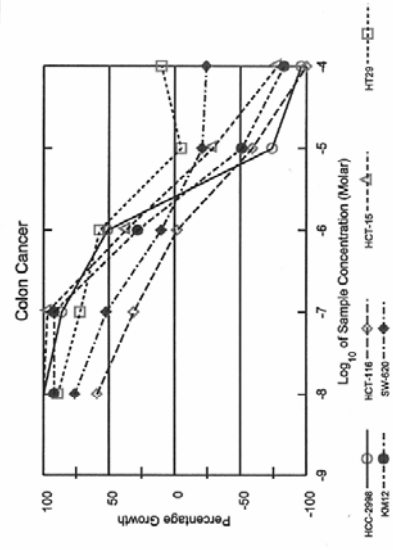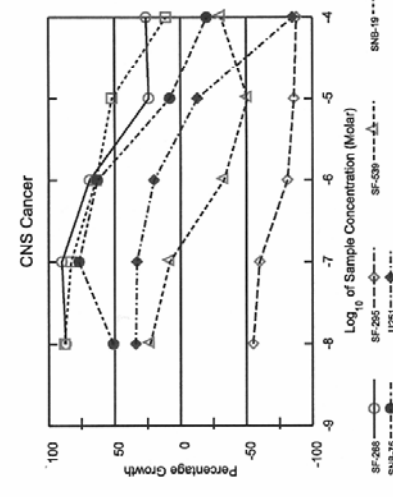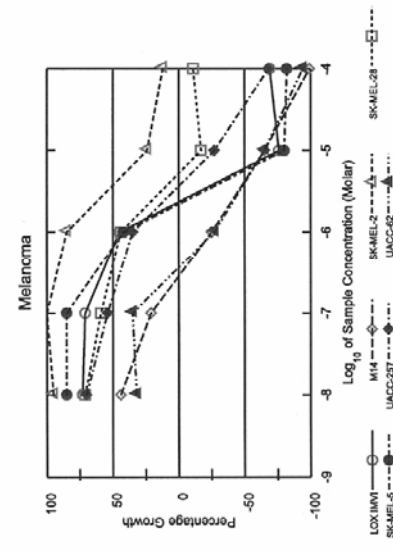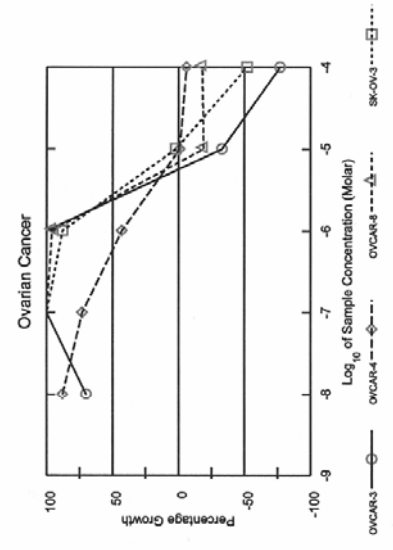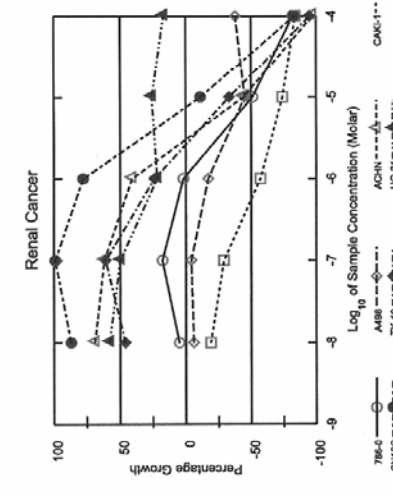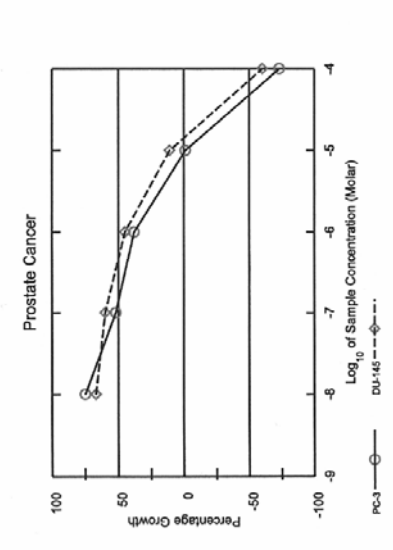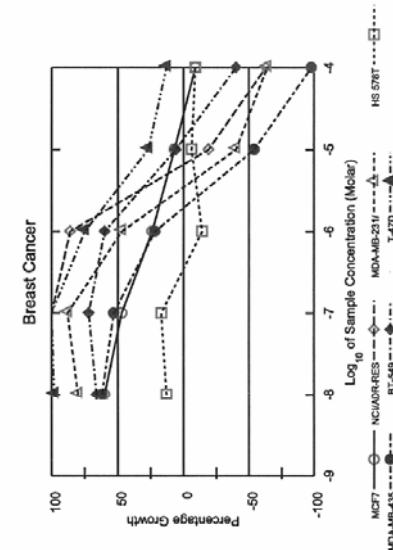

# $^1\text{H}$ and $^{13}\text{C}$ NMR Spectra of Compounds 1-10

## Schweinfurthin E (1)

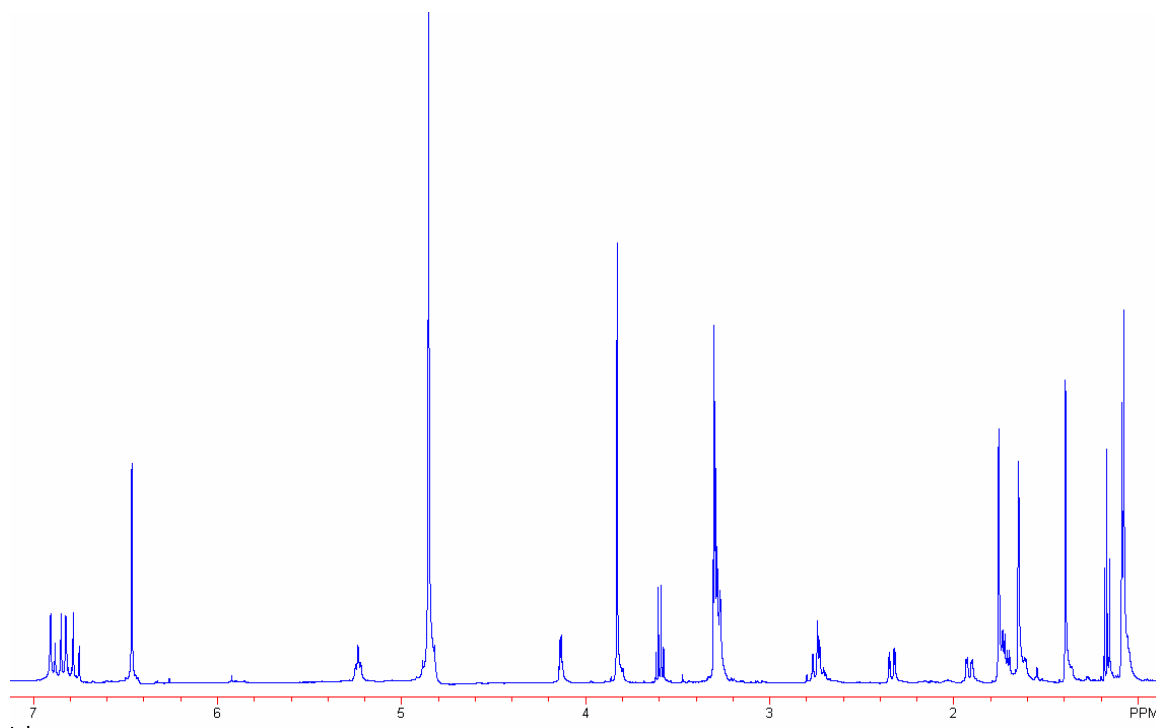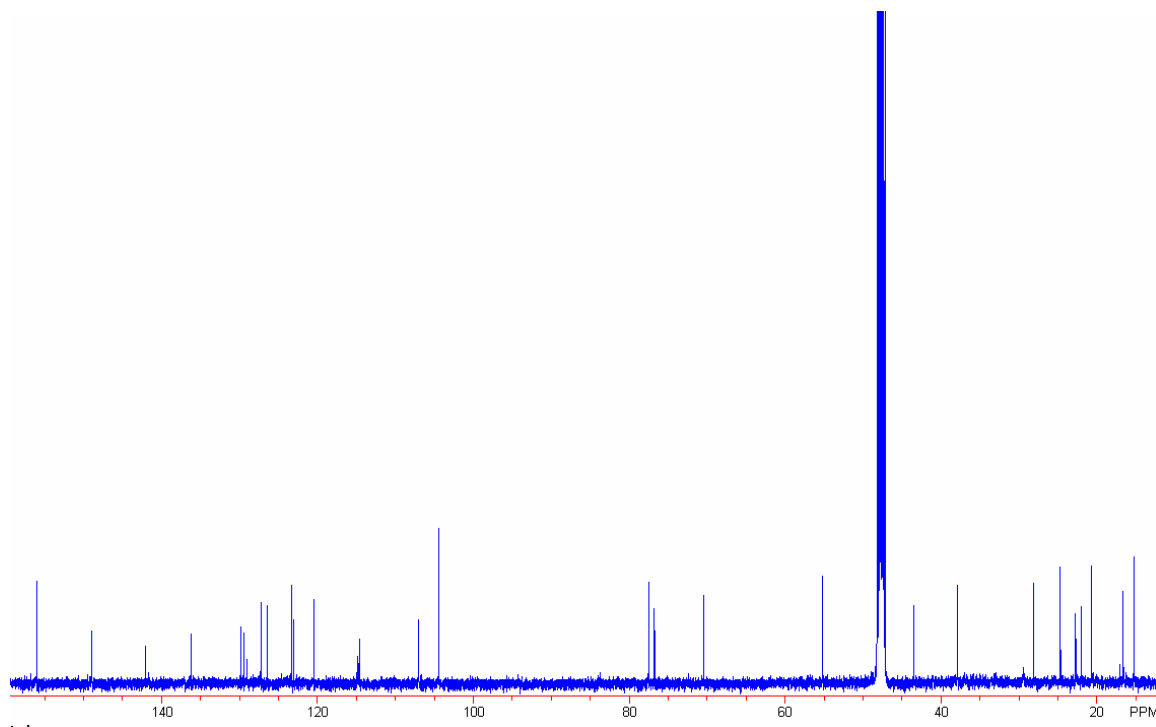

Schweinfurthin F (2)

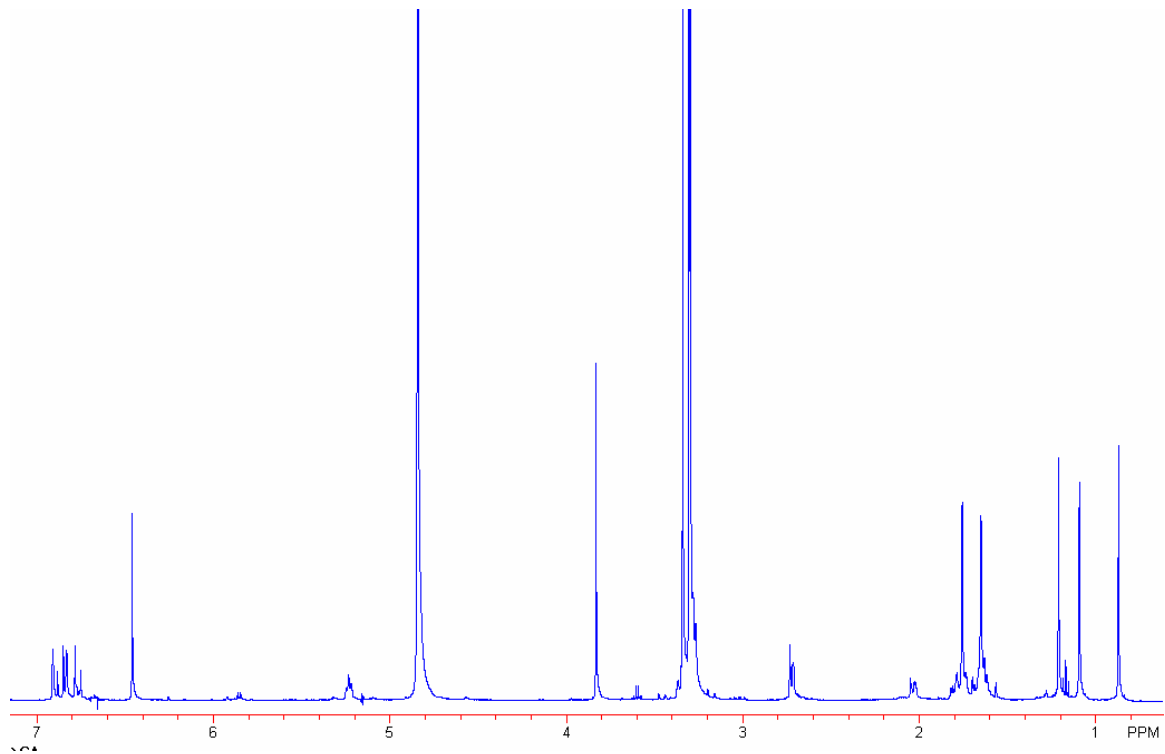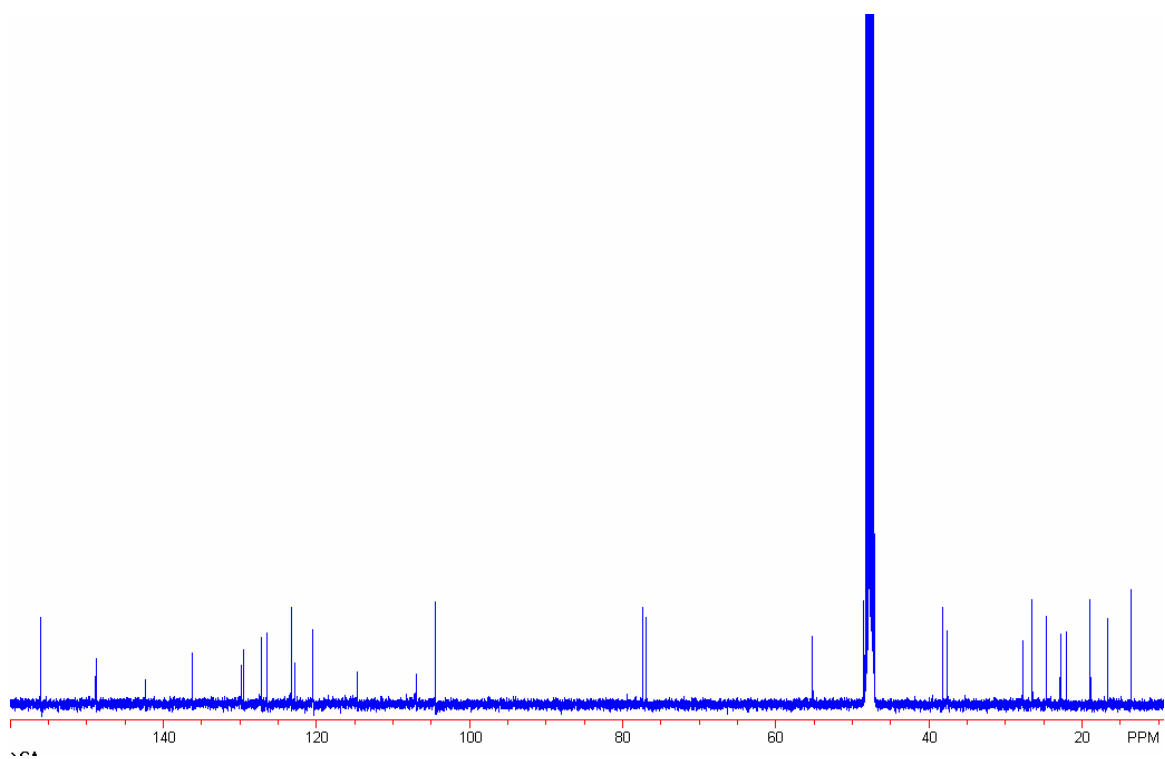



# Schweinfurthin G (3)

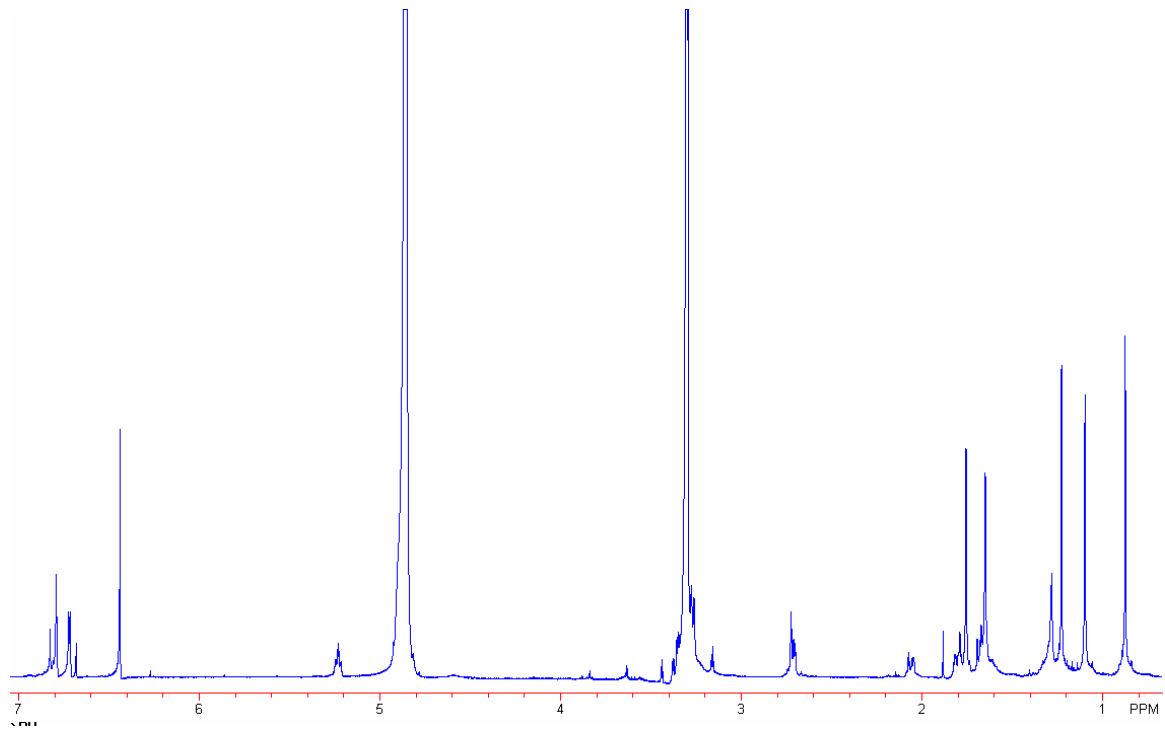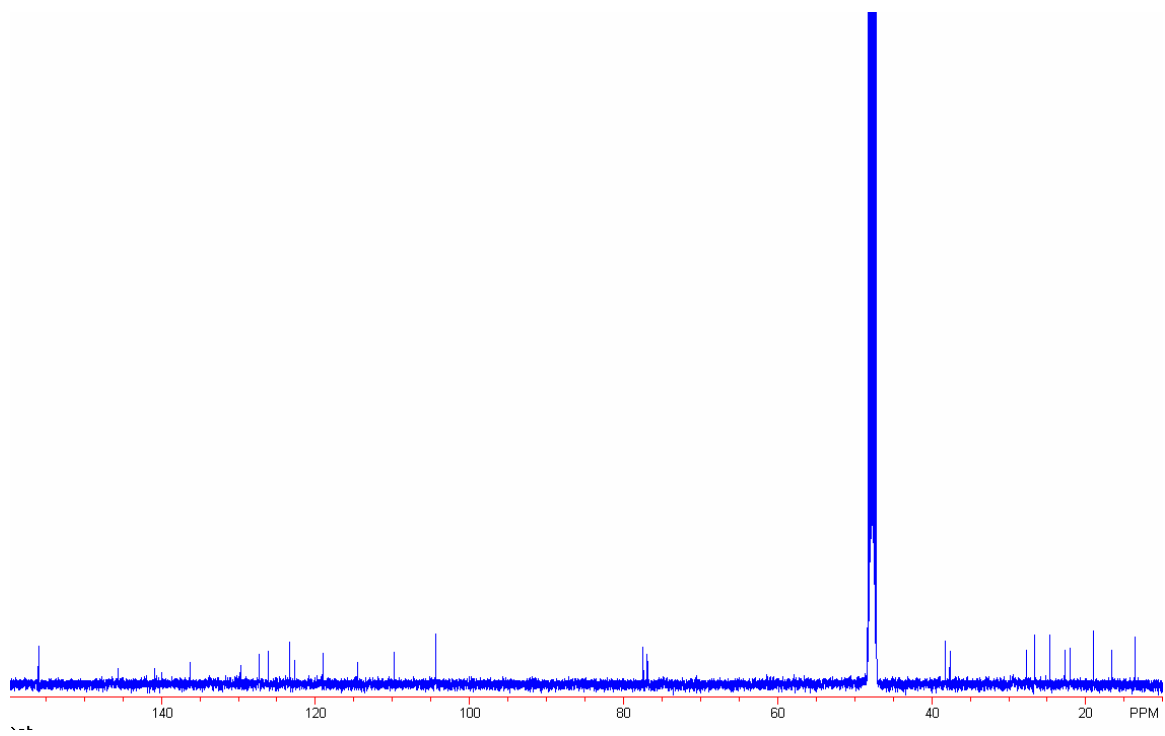

Schweinfurthin H (4)

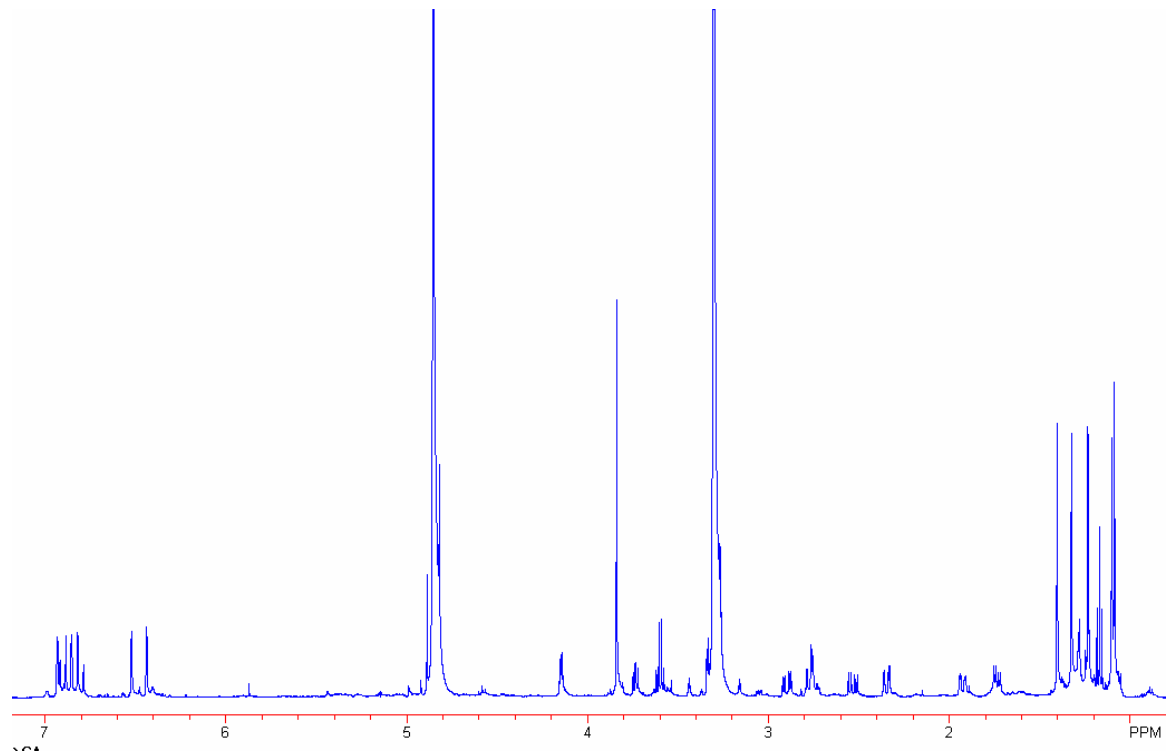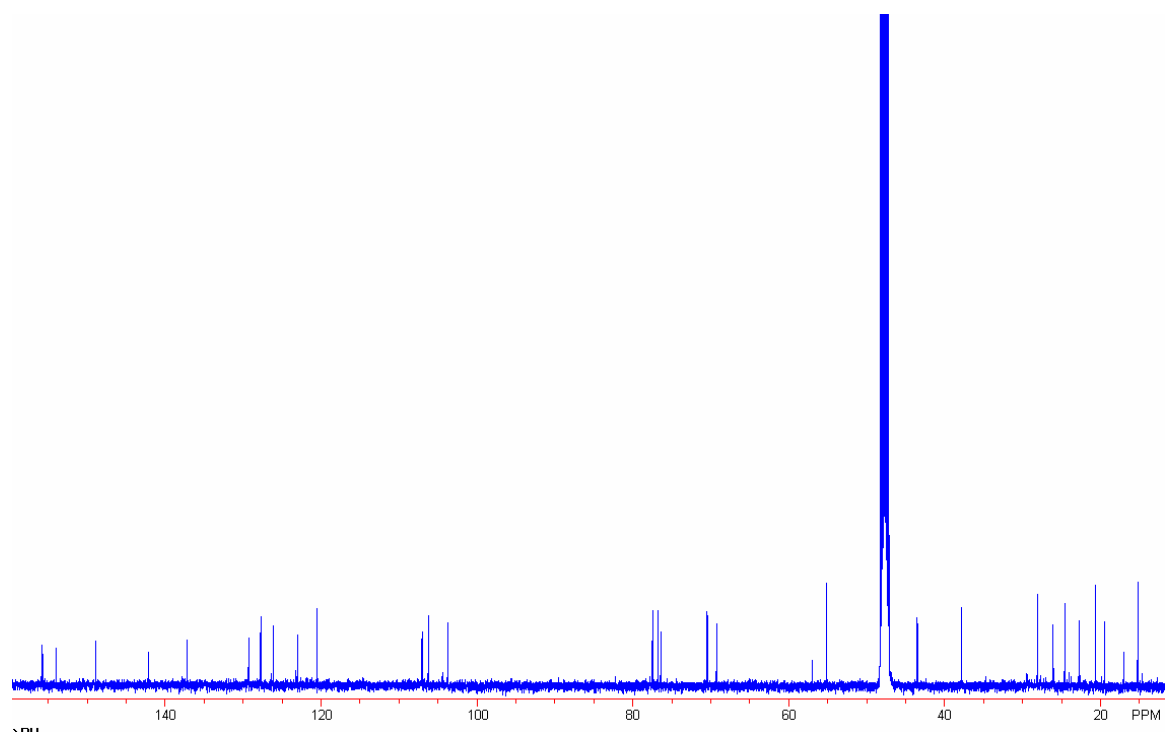

Alnifoliol (5)

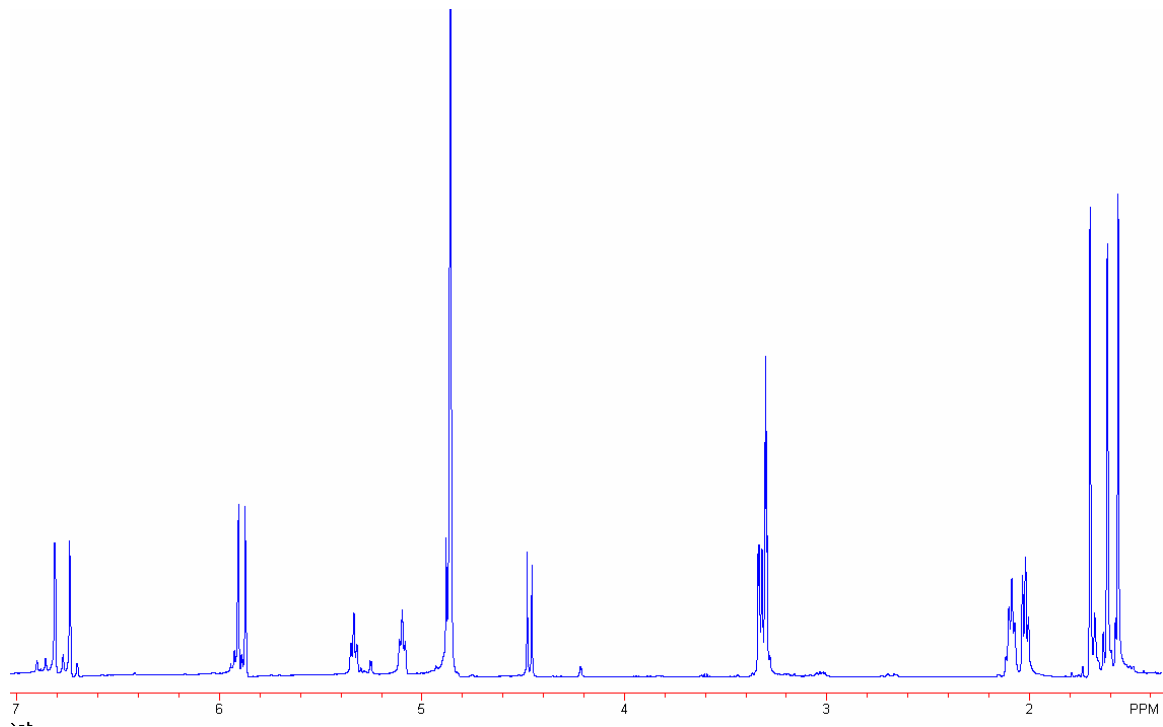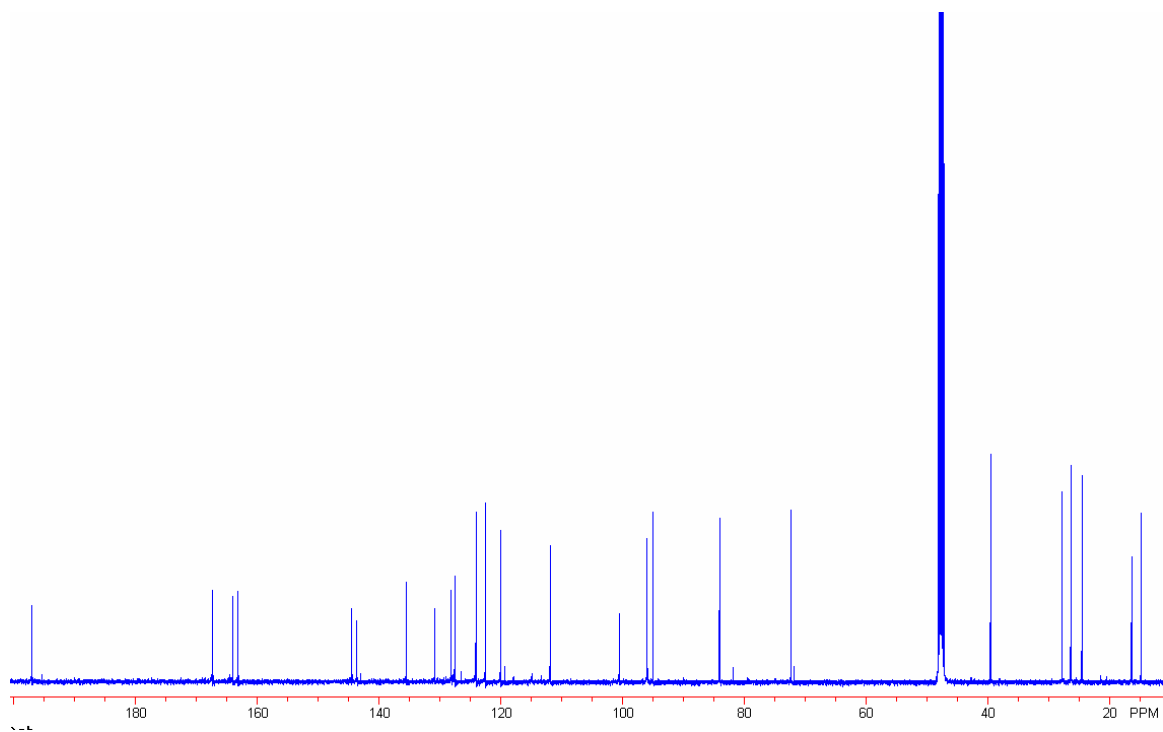

Vedelianin (6)

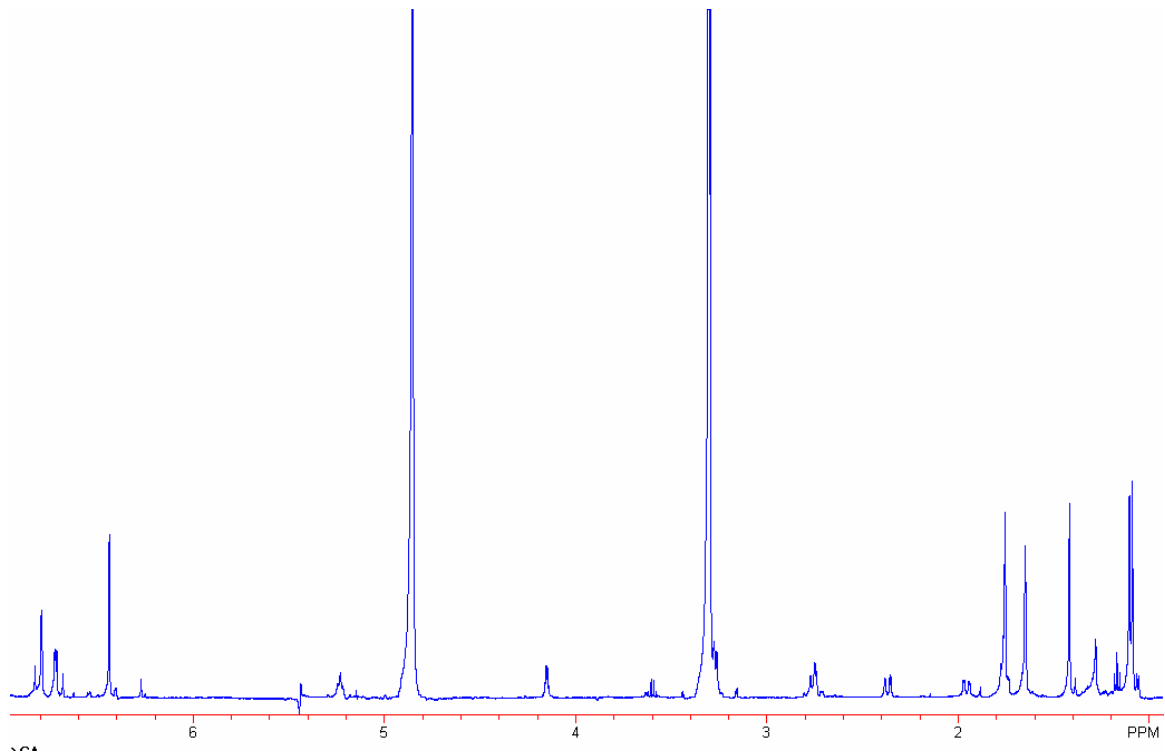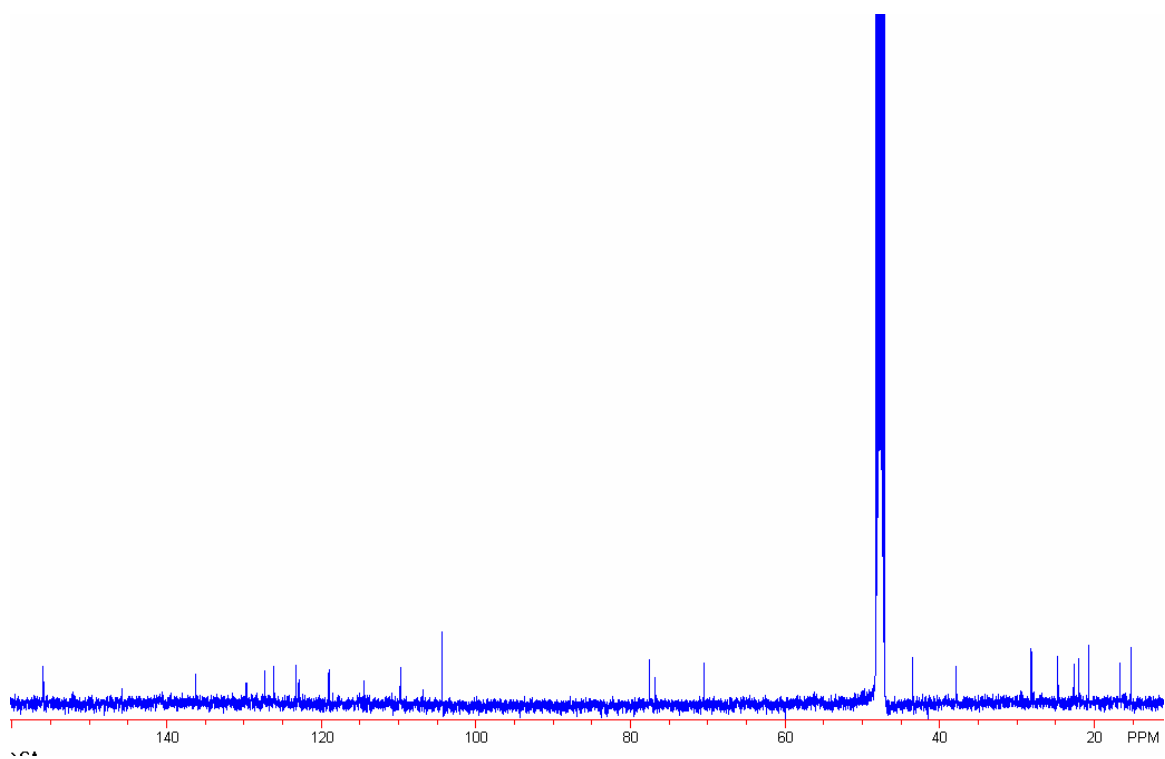

Bonanniol A (7)

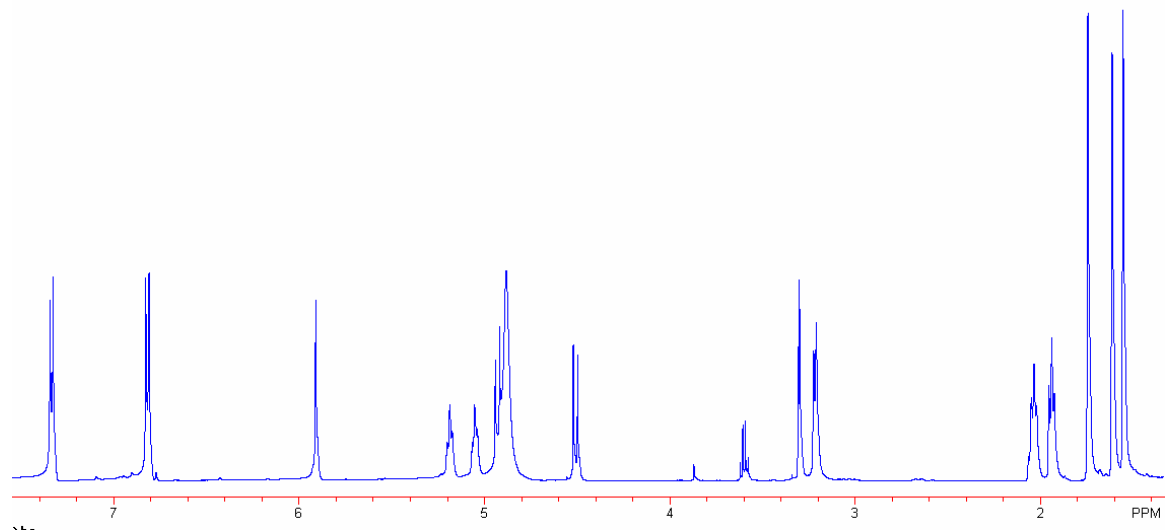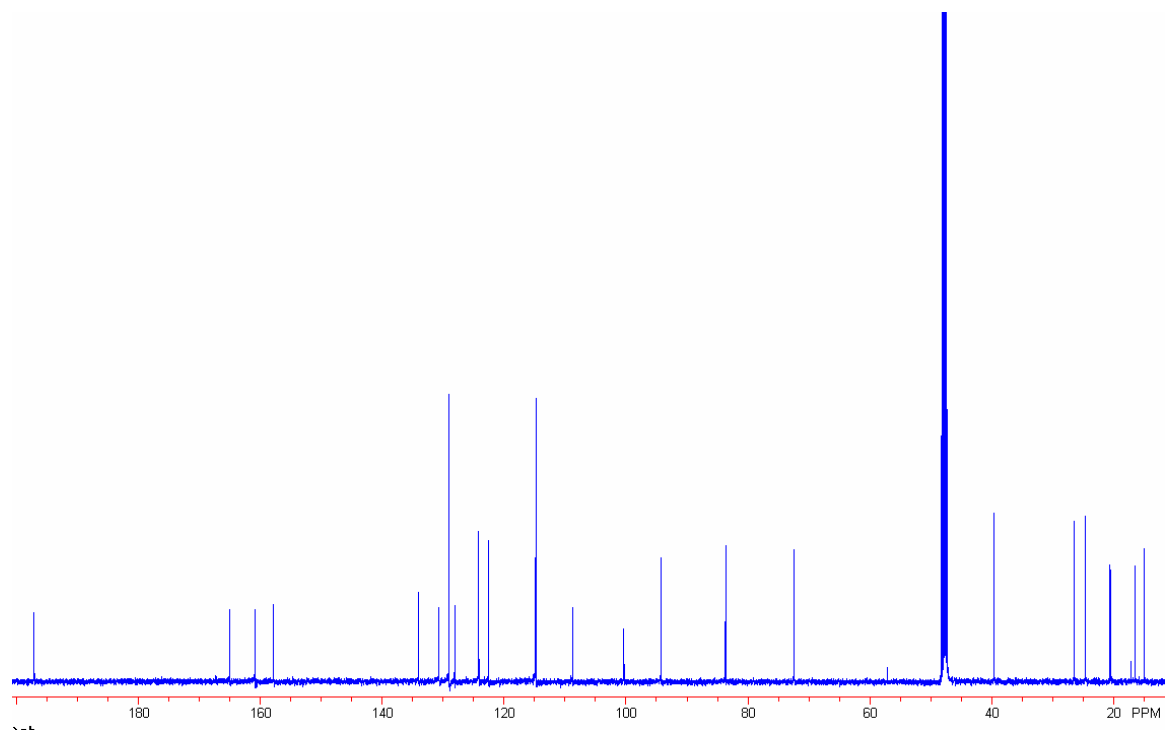

Diplacol (8)

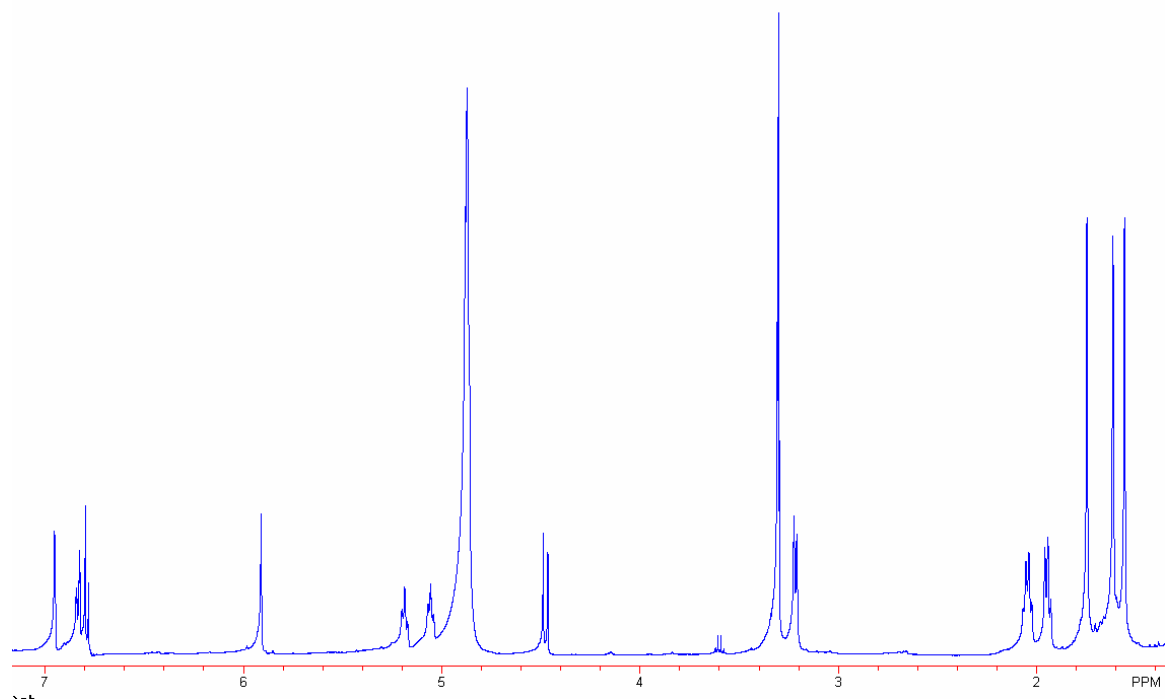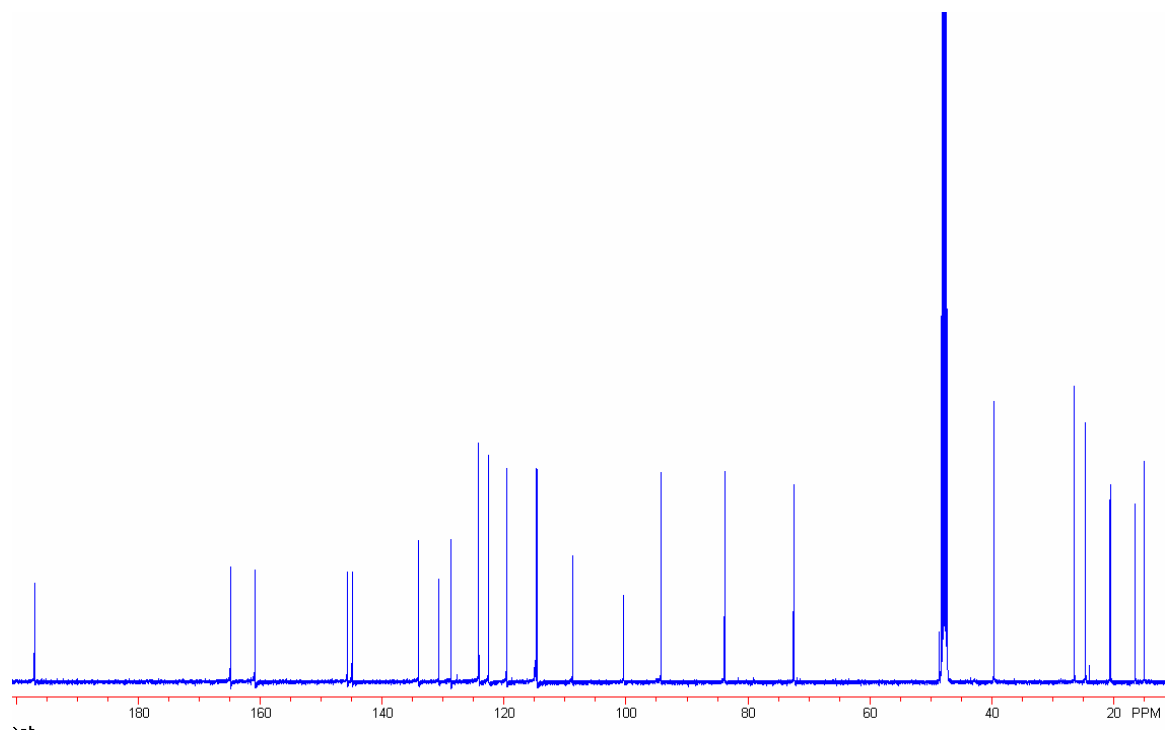

Bonannione A (9)

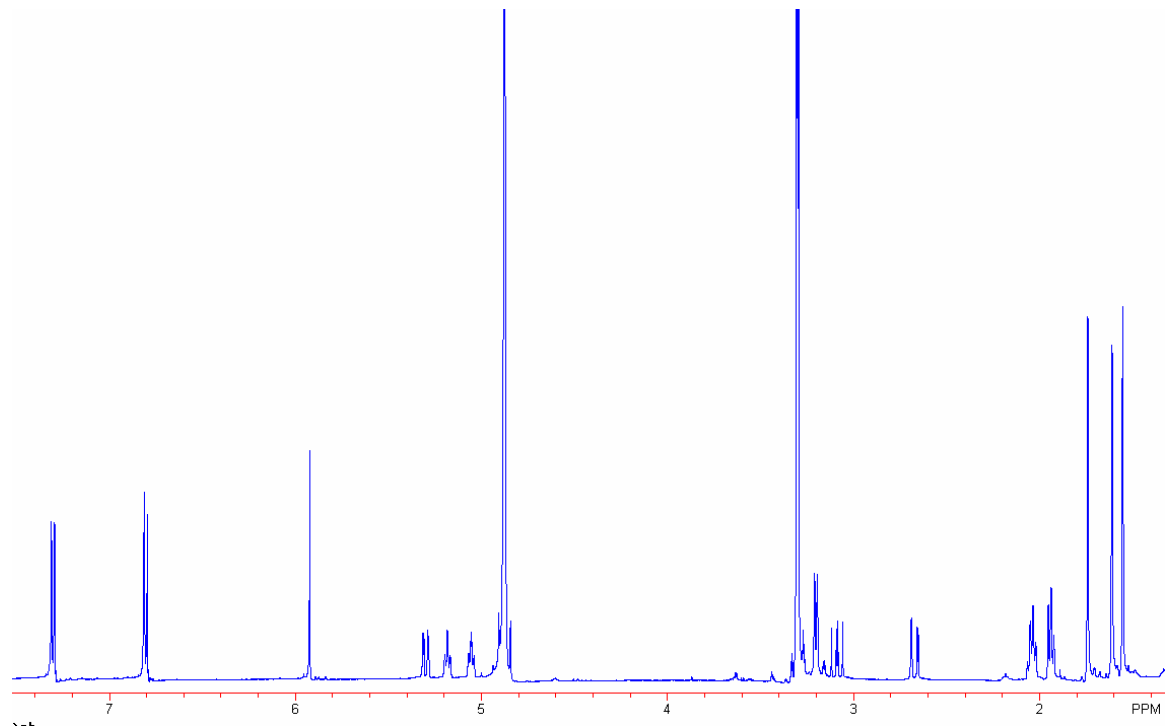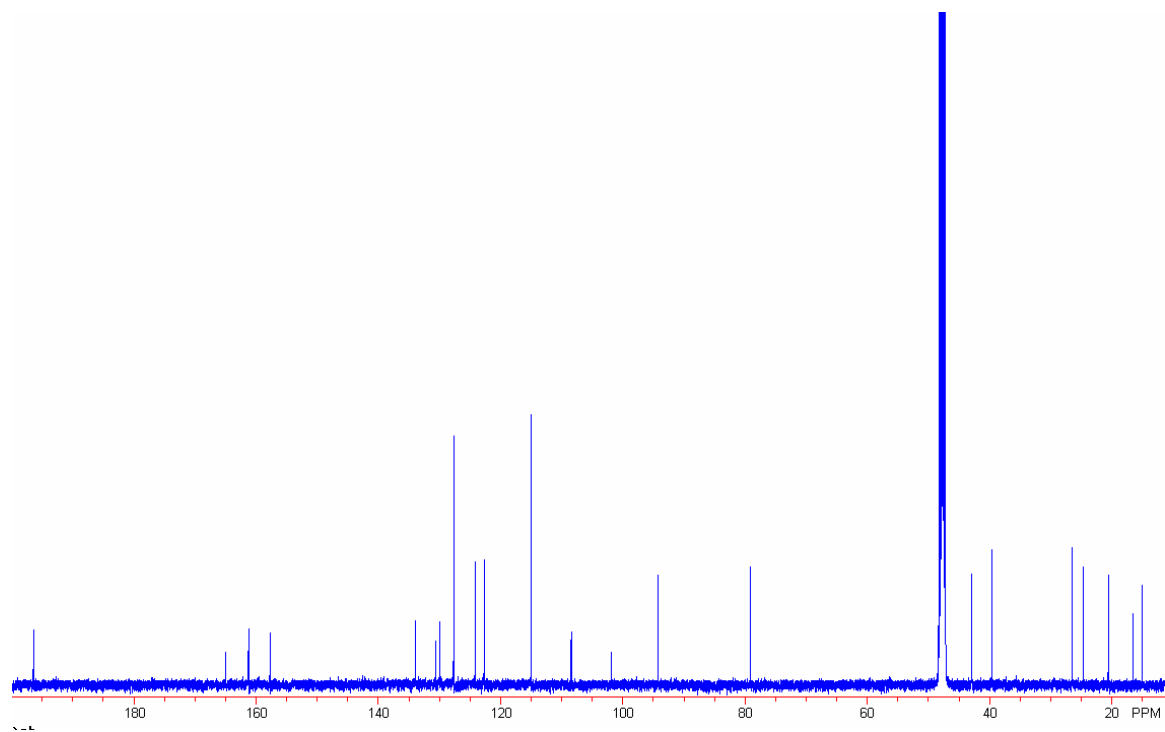

Diplacone (**10**)

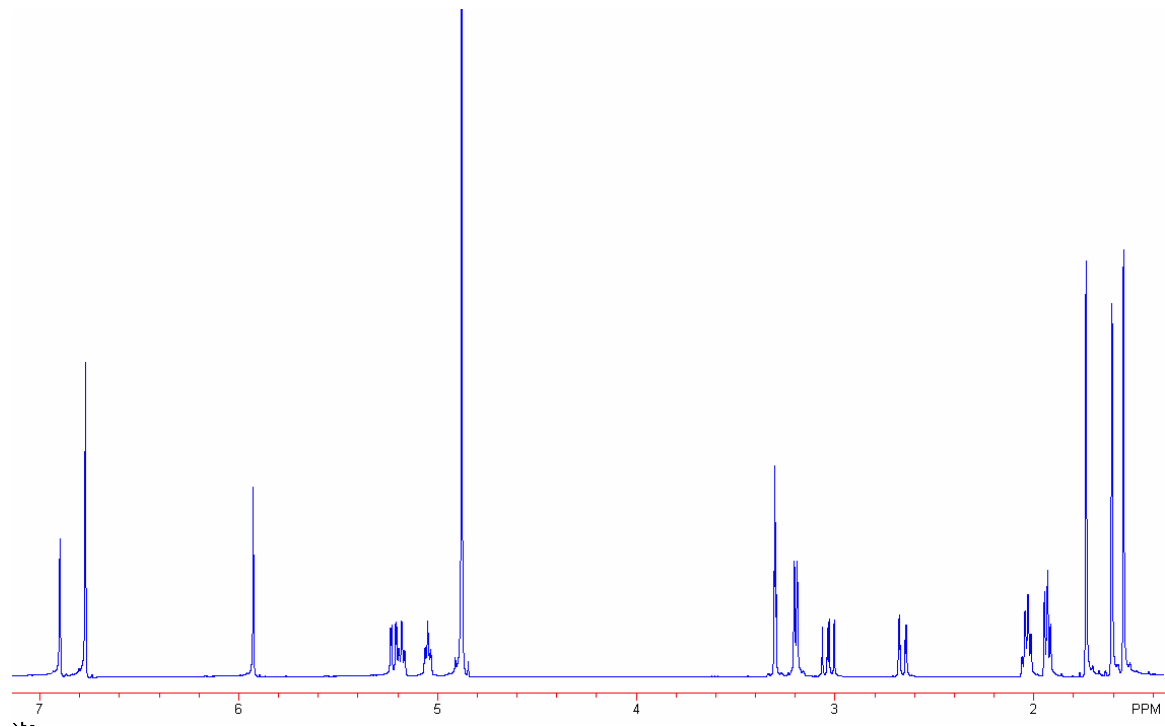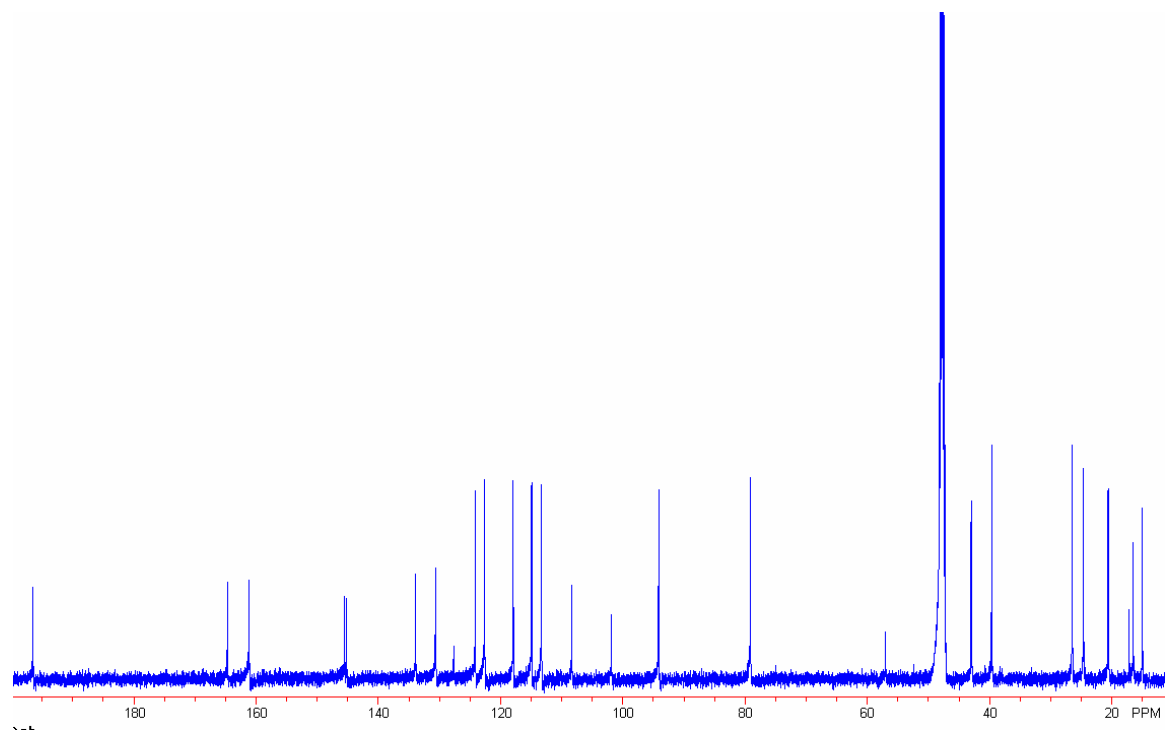



STANDARD 1H OBSERVE

Pulse Sequence: gcosy

Solvent: CD3OD

Ambient temperature

File: SC201-136-SCHM\_COSY\_01172007\_1

INOVA-400 "inovad00a1t"

Relax. delay 1.000 sec

Acq. time 0.158 sec

Width 6499.8 Hz

2D Width 6499.8 Hz

16 repetitions

128 increments

OBSERVE H1, 399.9456944 MHz

DATA PROCESSING

Sq. sine bell 0.079 sec

F1 DATA PROCESSING

Sq. sine bell 0.020 sec

FF size 2048 x 2048

Total time 40 min, 36 sec

Jan 17 2007

VA Tech Chemistry NMR Lab

### gcosy spectrum of 1

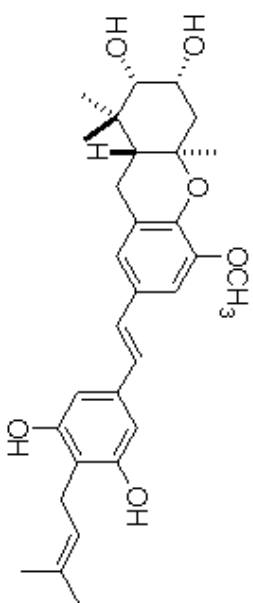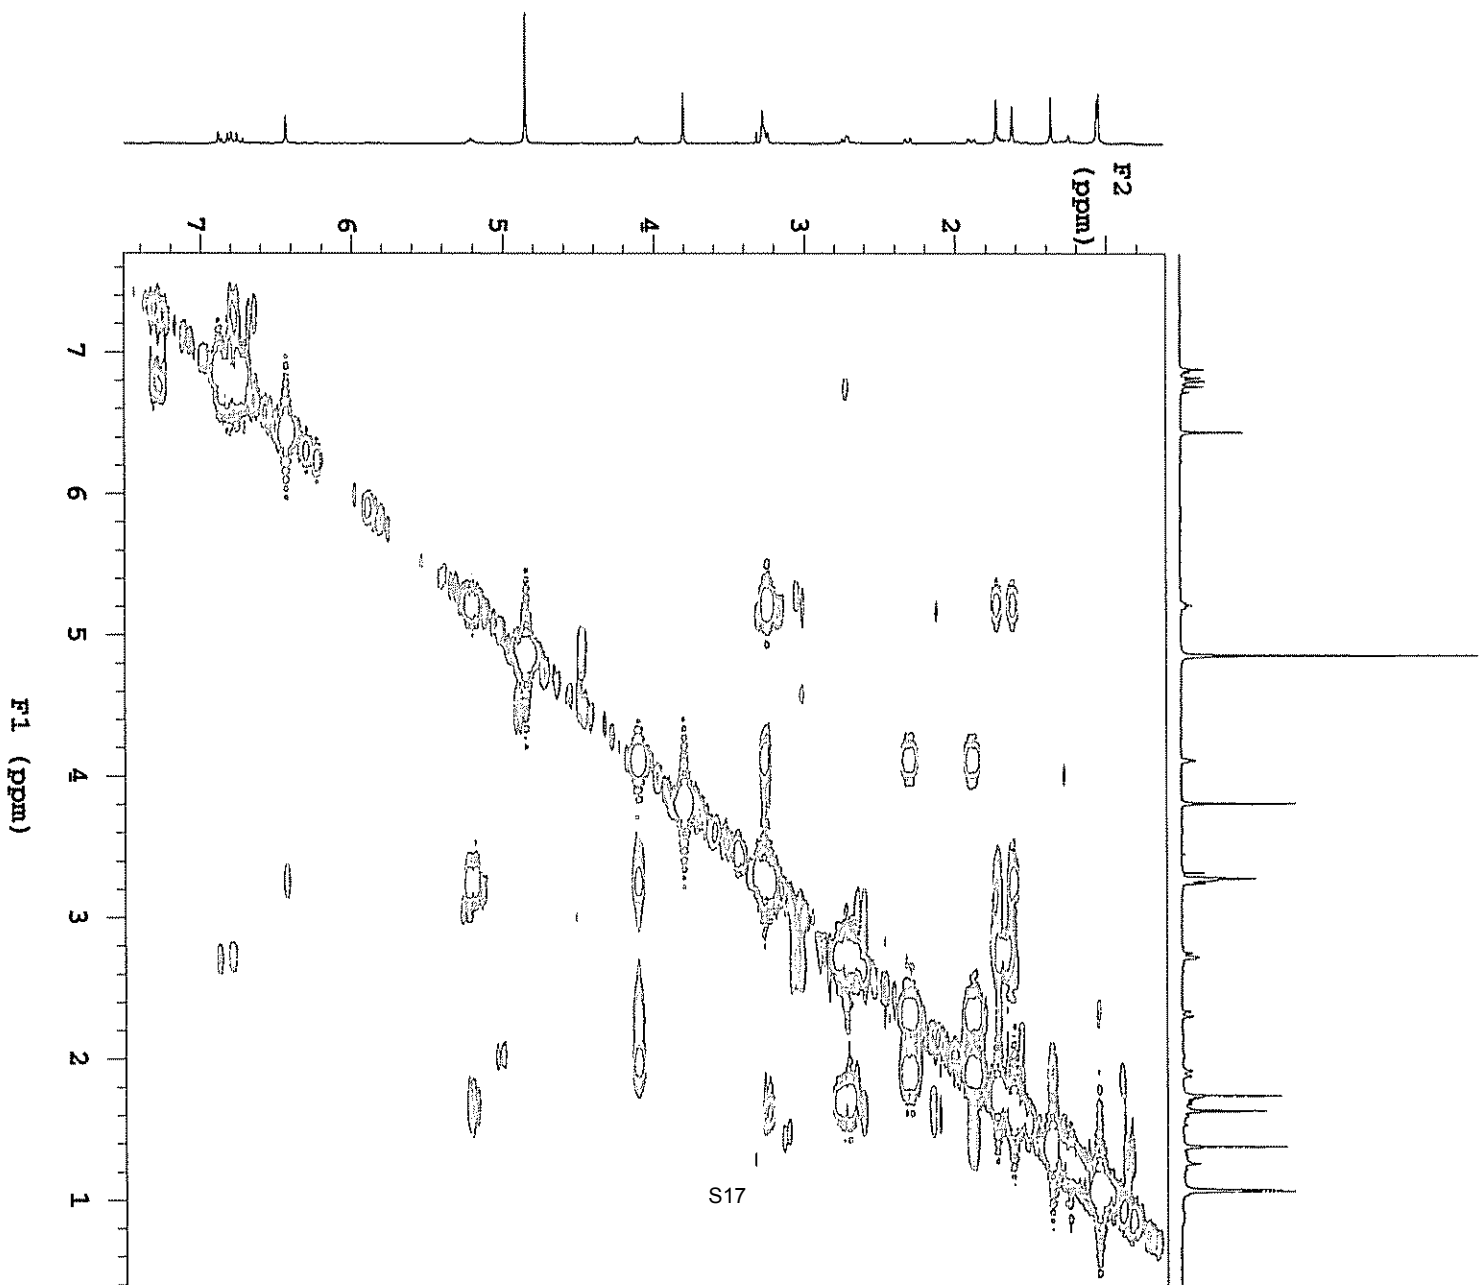

(Millions)

SC201-136-Sche\_1HmCD3OD\_01172007\_J-3.jdf

SC201-136-Sche\_HMQCmCD3OD\_01172007\_J-3.jdf

# HMQC Spectrum of 1

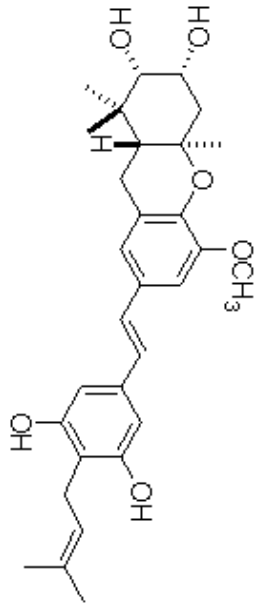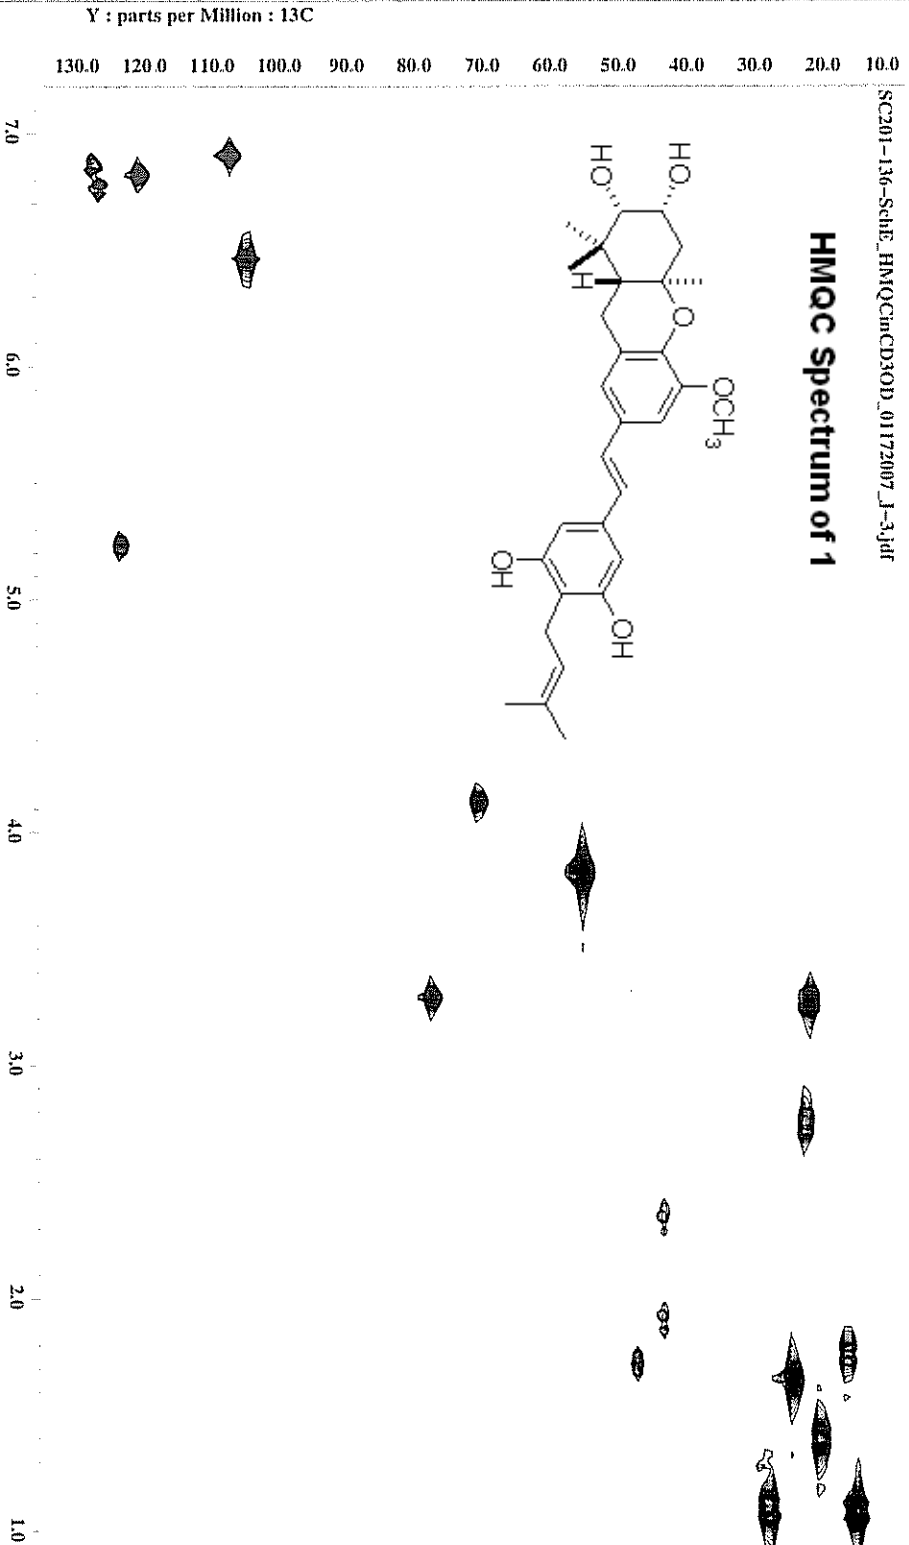

X: parts per Million : 1H

----- PROCESSING PARAMETERS -----

(Billions)

100.0 300.0 500.0

```

Filename      = SC201-136-Sche_HMQCin
Author        = Kingston
Experiment    = hmgc_1h_pfg_s_e
Sample_id     = SC201-136-Sche_HMQCin
Solvent      = METHANOL-D3
Creation_time = 17-JAN-2007 22:51:31
Revision_time = 18-JAN-2007 15:33:31
Current_time  = 18-JAN-2007 15:35:04

Content       = gradient enhanced HMQ
Data_format   = 2D REAL REAL
Dim_size      = 1024, 256
Dim_title     = 1H 13C
Dim_units     = X Y
Dimensions    = Delta NMR
Site          = DELTA_NMR
Spectrometer  =
  
```

```

Field_strength = 11.7473579(FT) (500 MHz)
X_acq_duration = 0.13639681(s)
X_domain       = 1H
X_freq         = 500.15991521(MHz)
X_offset      = 51(ppm)
X_pulses      = 1024
X_prescans    = 4
X_resolution   = 7.3315503(Hz)
X_sweep       = 7.50750751(KHz)
X_domain      = 13C
Y_freq        = 125.76529768(MHz)
Y_offset      = 100(ppm)
Y_pulses      = 256
Y_prescans    = 0
Y_resolution   = 122.83805031(Hz)
Y_sweep       = 31.44654088(KHz)
Mod_return    = 1
  
```

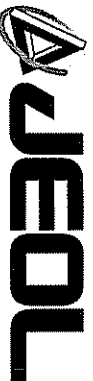

(Millions)

SC201-136-Sche\_HMBCinCD3OD\_01172007\_J\_copy-3.jdf

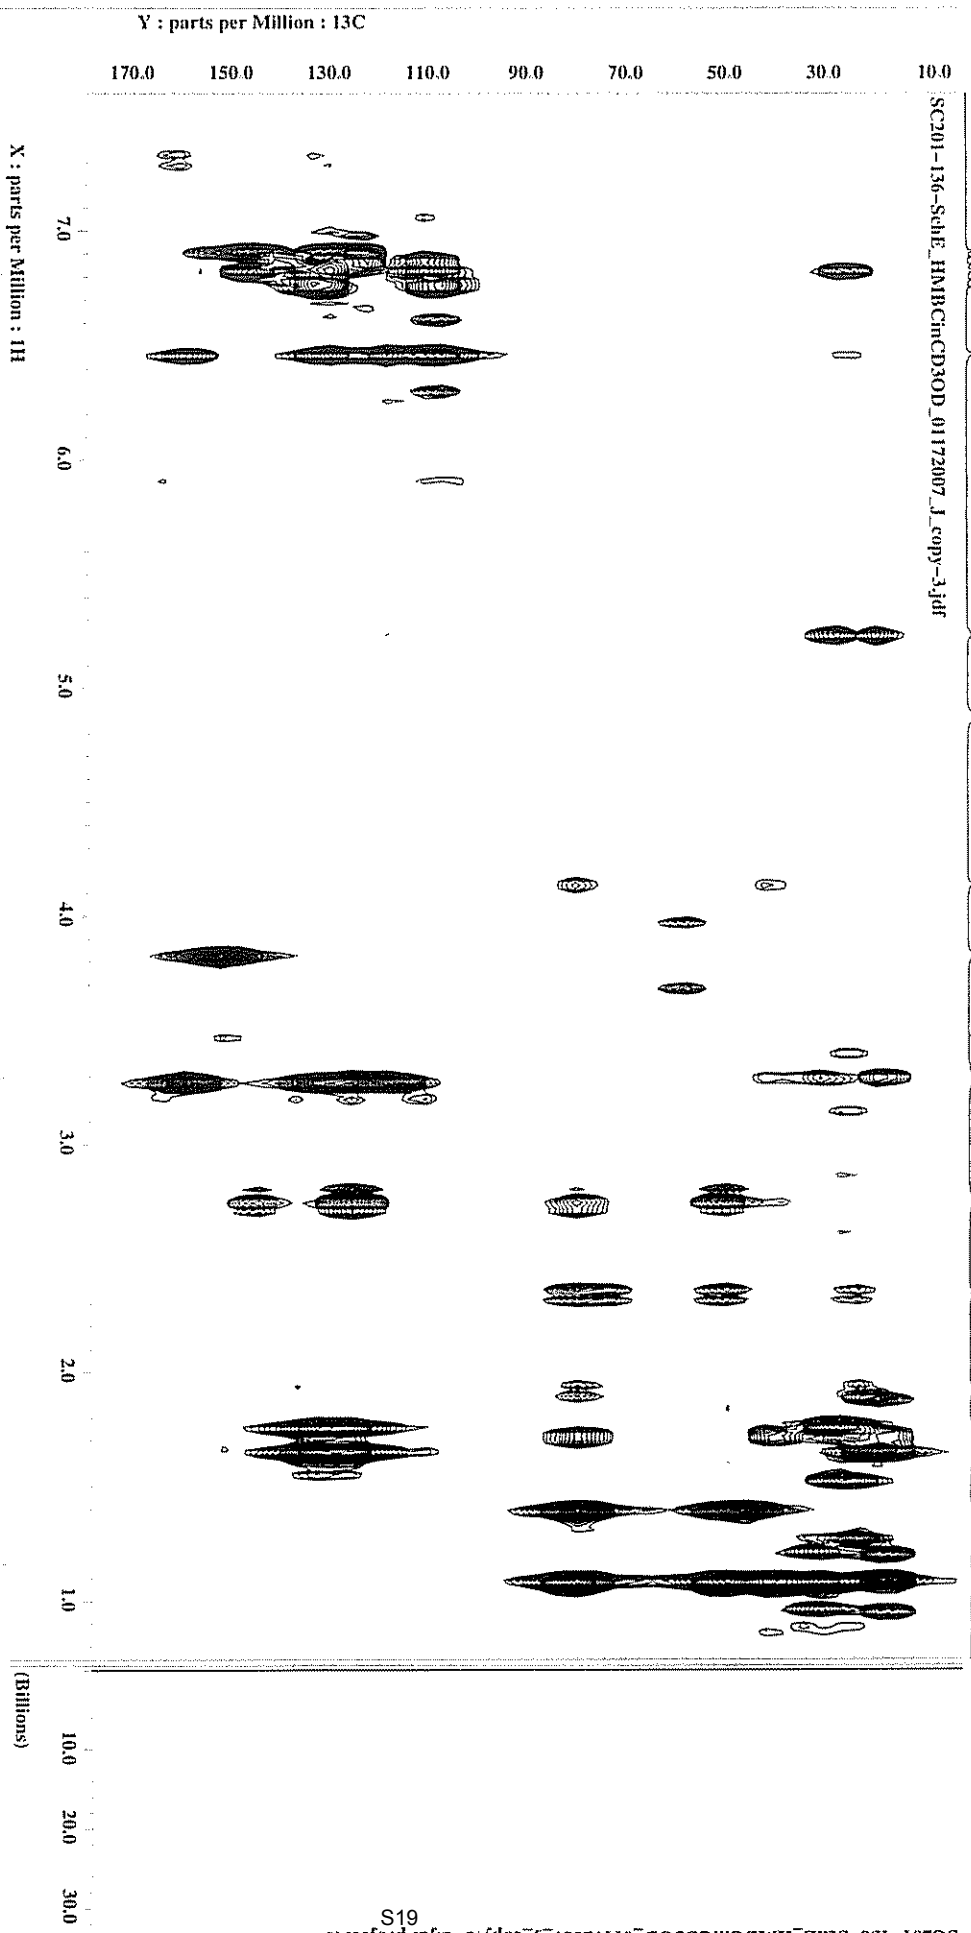

(Billions)

```

Filename = SC201-136-Sche_HMBCin
Author = Kingston
Experiment = hmbc_pfg_s_exp
Sample_id = SC201-136-Sche_HMBCin
Solvent = METHANOL-D3
Creation_time = 18-JAN-2007 08:46:47
Revision_time = 18-JAN-2007 15:36:11
Current_time = 18-JAN-2007 15:38:13

Content = gradient enhanced HMB
Data format = 2D PEARL REAL
Dim_1size = 1024 66
Dim_1title = 1H 13C
Dim_2size = 1H 13C
Dim_2title = [ppm] [ppm]
Dimensions = X Y
Site = Delta NMR
Spectrometer = DELTA_NMR
    
```

```

Field_strength = 11.7473579[GT] (500[MH
X_acq_duration = 0.1363968[is]
X_domain = 1H
X_freq = 500.15991521[MHz]
X_offset = 5[ppm]
X_points = 1024
X_prescans = 4
X_resolution = 7.3315503[Hz]
X_sweep = 7.59750751[MHz]
Y_domain = 13C
Y_freq = 125.76529768[MHz]
Y_offset = 100[ppm]
Y_points = 66
Y_prescans = 0
Y_resolution = 476.46274061[Hz]
Y_sweep = 31.44654088[MHz]
Clipped = FALSE
Mod_return = 1
    
```

HMBC Spectrum of 1

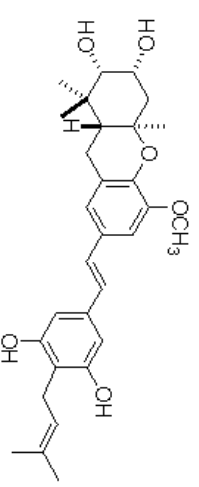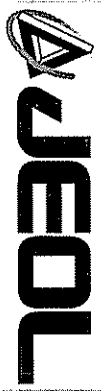

STANDARD 1H OBSERVE

Pulse Sequence: ROESY

Solvent: CD3OD

Ambient temperature

File: SC201-136-SchE\_ROESY\_011807\_1  
INOVA-400 "Inova400alt"

Relax. delay 1.000 sec

Mixing 0.200 sec

Acq. time 0.158 sec

Width 6499.8 Hz

2D Width 6499.8 Hz

10 repetitions

2 x 200 increments

OBSERVE H1, 399.9456944 MHz

DATA PROCESSING

Gauss apodization 0.073 sec

F1 DATA PROCESSING

Gauss apodization 0.028 sec

FT size 2048 x 2048

Total time 1 hr, 33 min, 42 sec

Jan 18 2007

VA Tech Chemistry NMR Lab

### ROESY Spectrum of 1

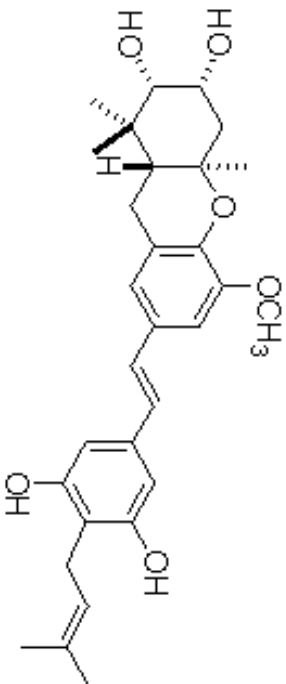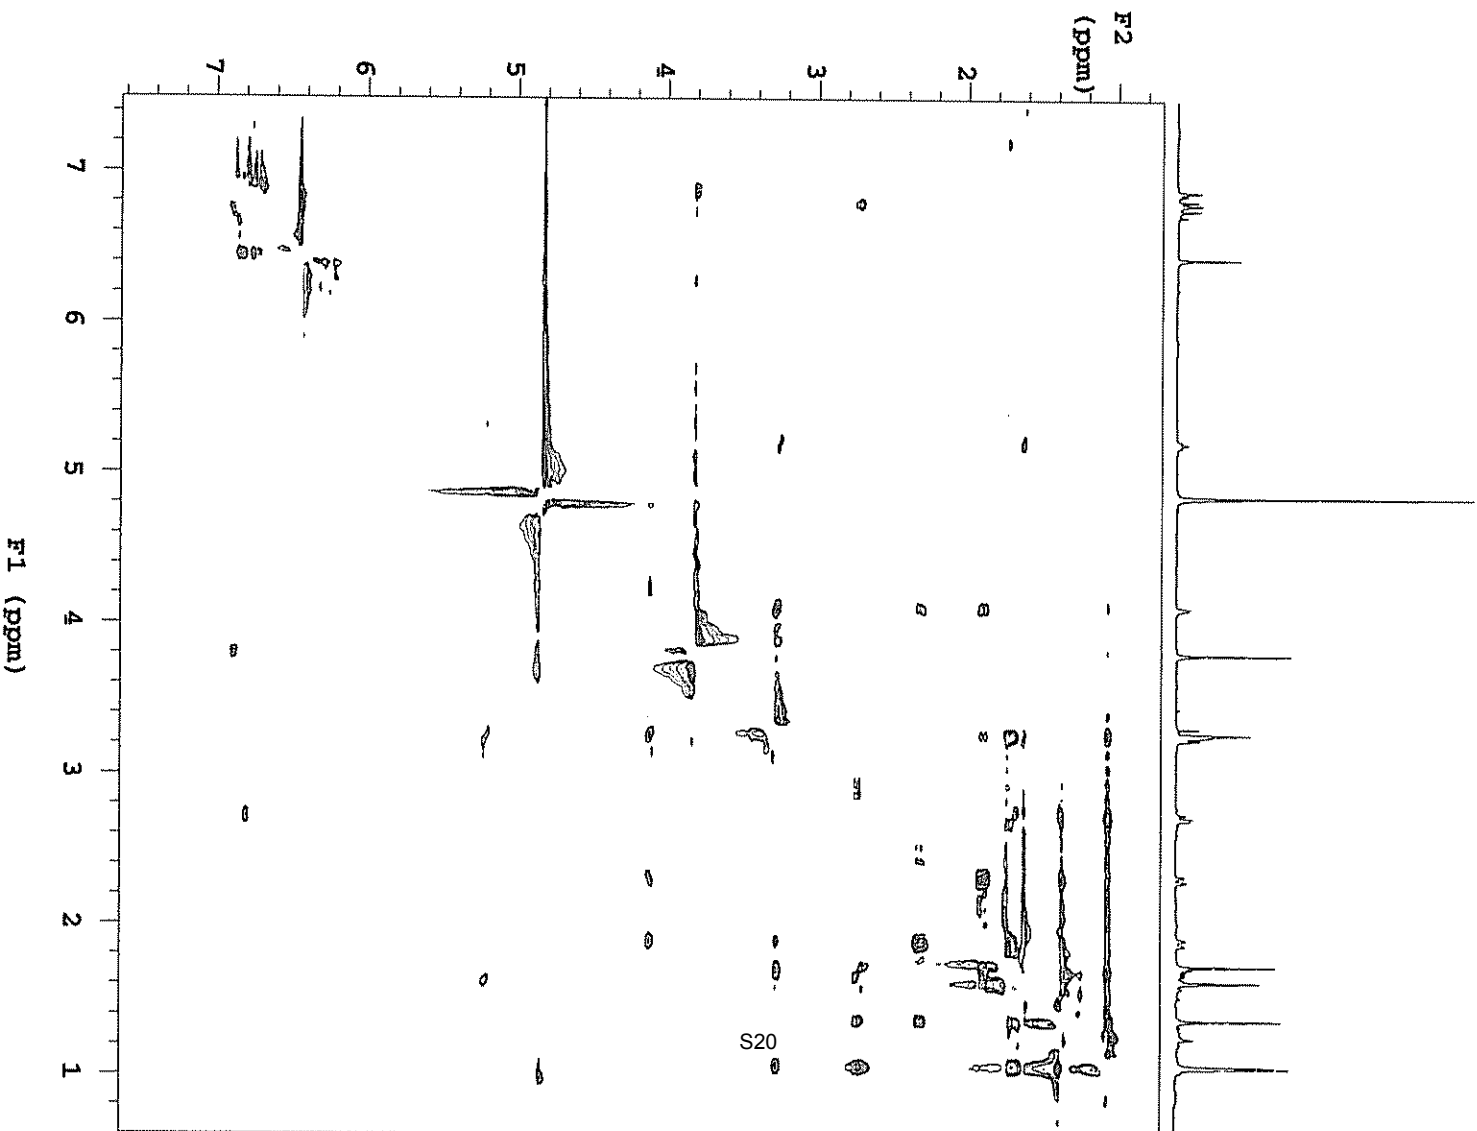

Supplement: NIHMS49556-supplement-1.pdf [file NIHMS49556-supplement-1.pdf]
